# Supplementary material
Source: PubMed Central journal article supplement (PMC6439631)
Supplement: jamasurg-154-e185113-s001.pdf [file jamasurg-154-e185113-s001.pdf]

## Supplementary Online Content

Eaglehouse YL, Georg MW, Shriver CD, Zhu K. Racial differences in time to breast cancer surgery and overall survival in the US Military Health System. *JAMA Surg*. Published online January 23, 2019. doi:10.1001/jamasurg.2018.5113

**eTable.** Post-hoc Cox Proportional Hazards Analysis Comparing Overall Survival Between Non-Hispanic Black and White Women Receiving Breast Conserving Surgery as Treatment for Breast Cancer Grouped by Time-to-Surgery

This supplementary material has been provided by the authors to give readers additional information about their work.

**eTable. Post-hoc Cox Proportional Hazards Analysis Comparing Overall Survival Between Non-Hispanic Black and White Women Receiving Breast Conserving Surgery as Treatment for Breast Cancer Grouped by Time-to-Surgery<sup>a</sup>**

| Breast Conserving Surgery | Time-to-Surgery $\leq$ median |           |                    |                    | Time-to-Surgery $>$ median |          |                   |                   |
|---------------------------|-------------------------------|-----------|--------------------|--------------------|----------------------------|----------|-------------------|-------------------|
|                           | Race-ethnicity                | n         | Deaths (%)         | aHR (95% CI)       | aHR +TTS (95% CI)          | n        | Deaths (%)        | aHR (95% CI)      |
| Non-Hispanic White        | 1,261                         | 92 (7.3)  | 1.00 (reference)   | 1.00 (reference)   | 1,239                      | 66 (5.3) | 1.00 (reference)  | 1.00 (reference)  |
| Non-Hispanic Black        | 322                           | 33 (10.3) | 1.67 (1.04, 2.69)* | 1.69 (1.06, 2.71)* | 325                        | 28 (8.6) | 1.45 (0.89, 2.36) | 1.37 (0.84, 2.27) |

Models adjusted for age at diagnosis, marital status, military service branch, active-duty status, care source, benefit type, TRICARE region, year of diagnosis, tumor stage, tumor grade, hormone receptor status, surveillance mammography, chemotherapy treatment, radiation treatment, hormone treatment, and comorbid conditions

\* $p < 0.05$

<sup>a</sup> Time-to-Surgery strata determined from overall sample median of 18 days for those receiving breast conserving surgery
